# Supplementary material for: Response Surface Methodology for the Optimization of Flavan-3-ols Extraction from Avocado By-Products via Sonotrode Ultrasound-Assisted Extraction
Source: MDPI journal article supplement (doi:10.3390/antiox12071409), 2023-07-11
Supplement: s1 [file s1]

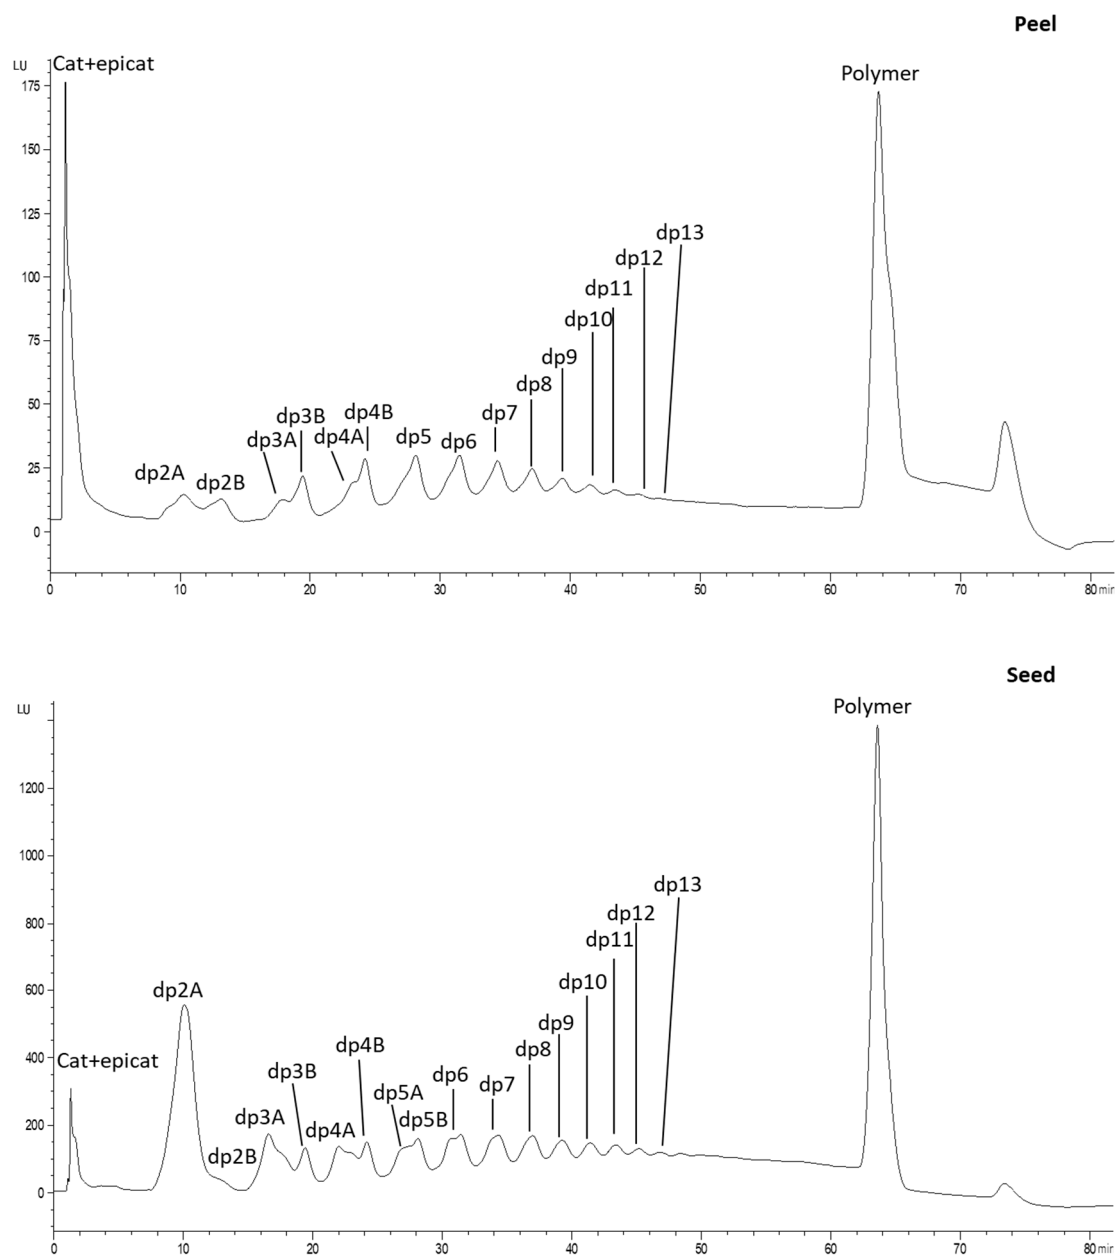

**Figure S1.** Fluorescence chromatograms of the identified flavan-3-ols in avocado peel and seed extracts obtained by sonotrode optimal conditions. Cat+epicat: catechin + epicatechin; dp: degree of polymerization.

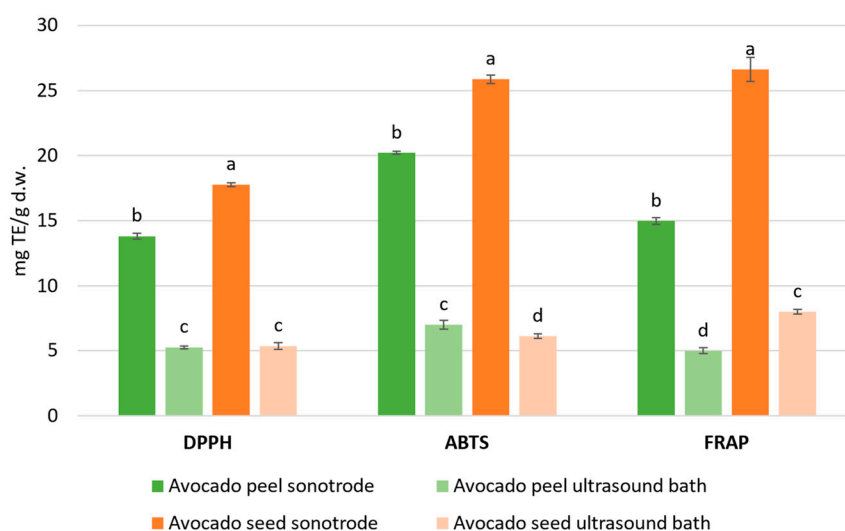

**Figure S2.** Representation of the antioxidant activity (DPPH, ABTS and FRAP) of the optimal extracts obtained by sonotrode in comparison with ultrasound bath. Different letters (a-d) in the same method indicate significative differences.

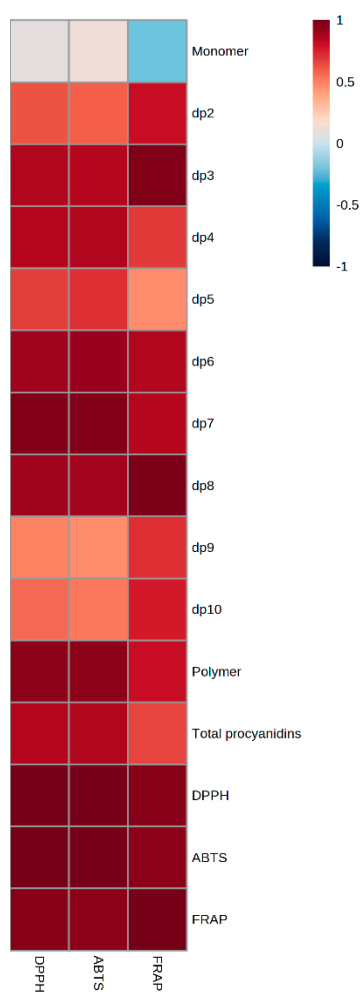

**Figure S3.** Correlation heatmap of the procyanidin profile and the antioxidant assays in the avocado by-products.
